# Supplementary material for: Time-of-Day Effects on Short-Duration Maximal Exercise Performance
Source: PubMed Central journal article supplement (PMC7289891; doi:10.1038/s41598-020-66342-w), 2020-06-11
Supplement: 41598_2020_66342_MOESM1_ESM.pdf [file 41598_2020_66342_MOESM1_ESM.pdf]

## Supplementary material

### **Search strategy**

#### PubMed and PubMed Central (184 results)

("time of day" OR "time-of-day") AND (exercise performance) AND (morning OR evening OR afternoon OR night) AND (strength OR neuromuscular OR resistance OR endurance OR isometric OR isokinetic))

#### Google Scholar (352 results)

("time-of-day" OR "time of day") AND ("exercise performance") AND ("short-term exercise" OR "short-duration exercise") AND (morning OR evening OR afternoon OR night) AND (strength OR neuromuscular OR resistance OR endurance OR isometric OR isokinetic)
